# Supplementary material
Source: PubMed Central journal article supplement (PMC3844114)

Figure S1 Tao Lin

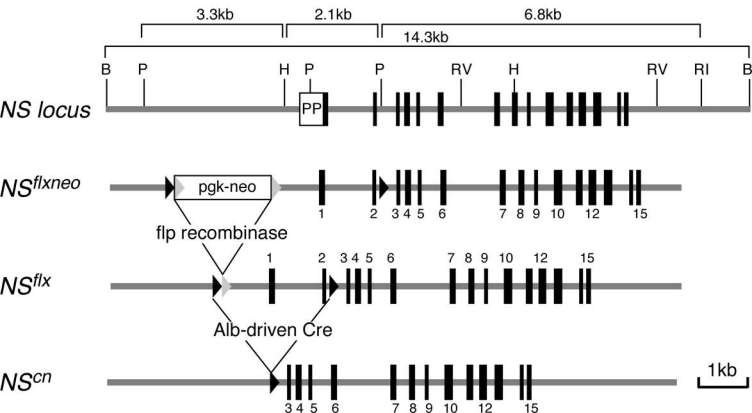

Figure S2 Tao Lin

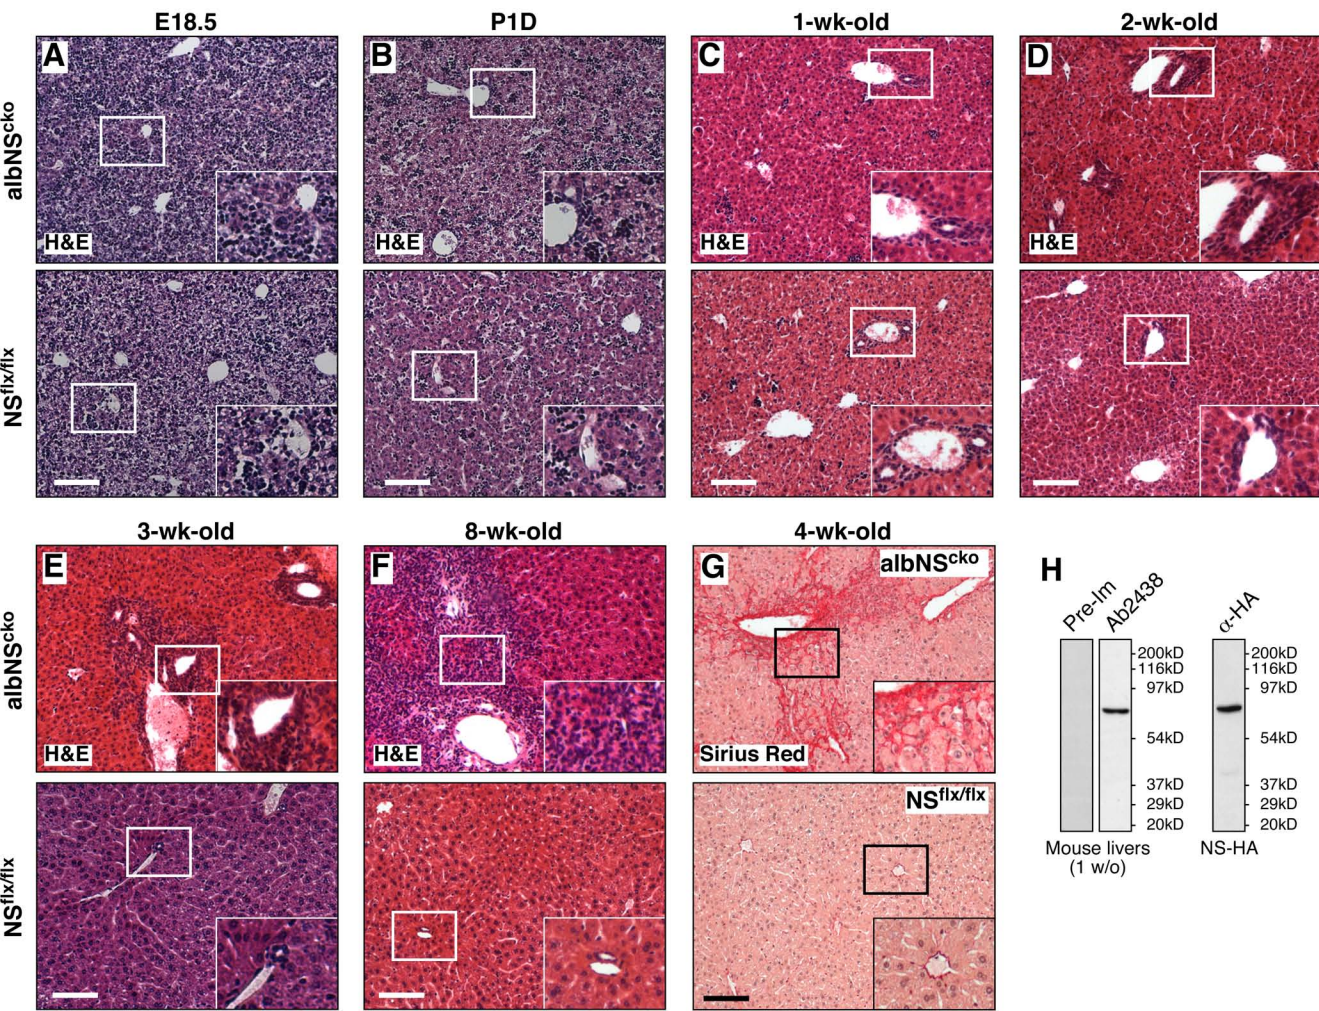

Figure S3 Tao Lin

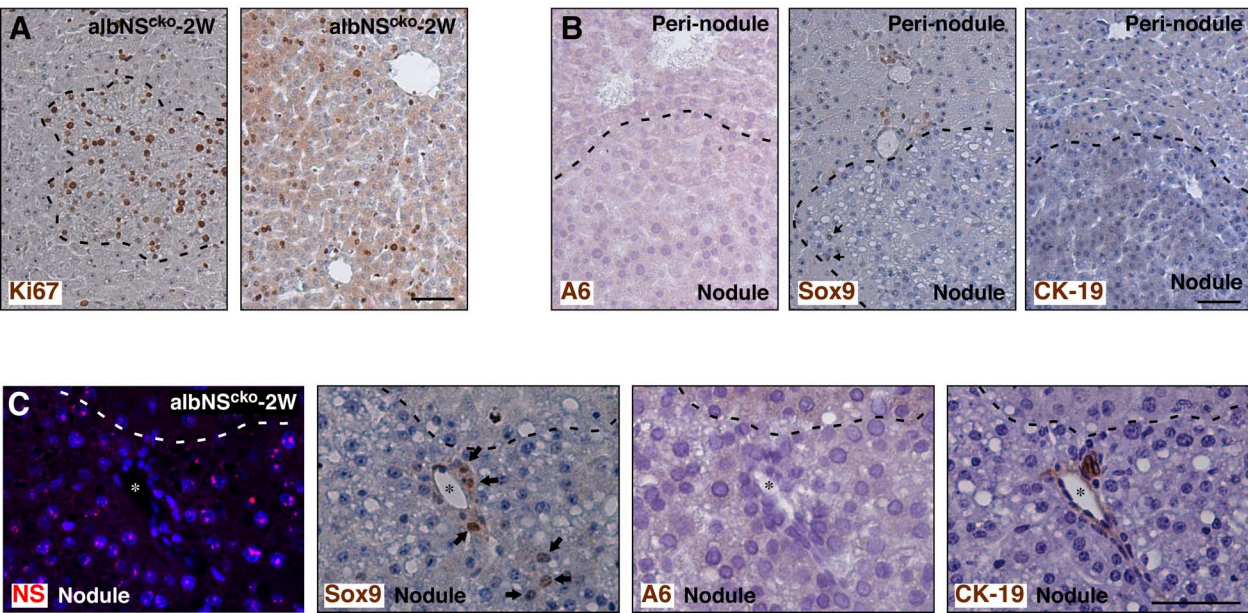

Figure S4 Tao Lin

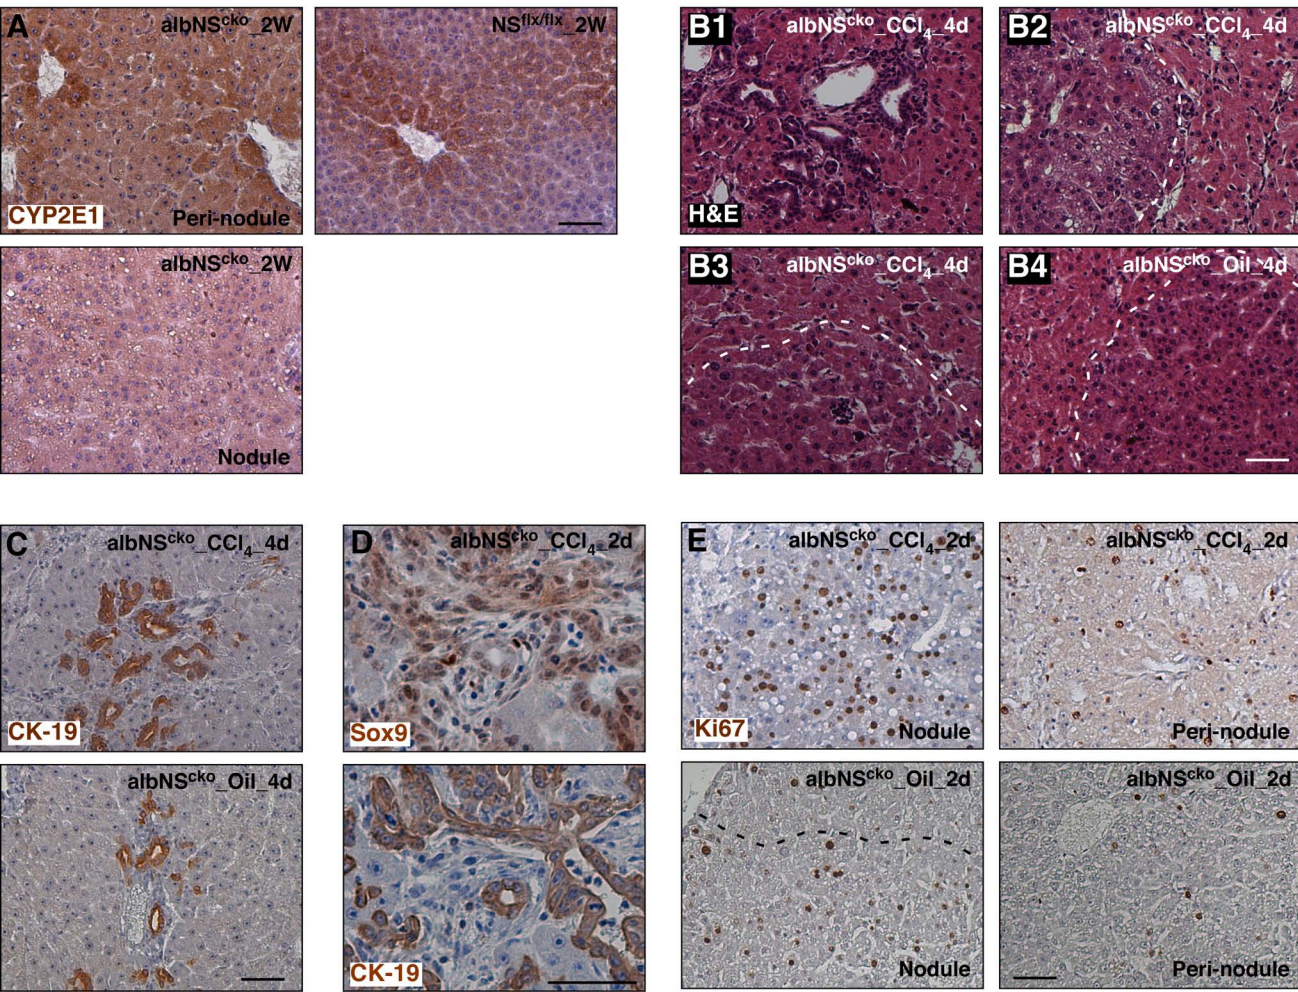

A

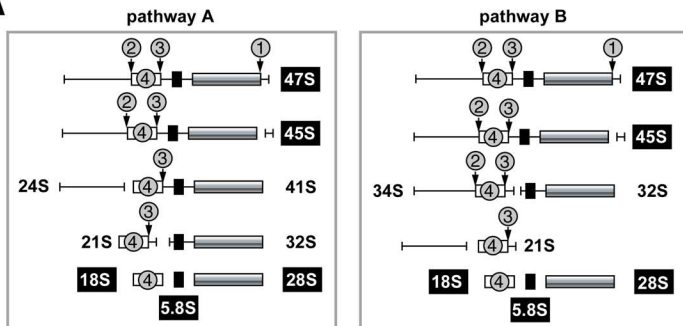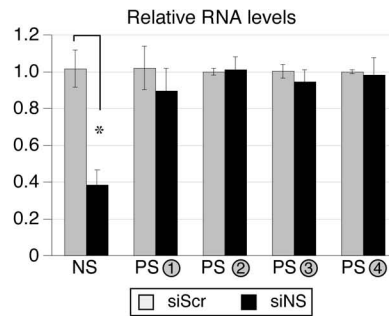B  $\gamma$ -H2AX/Topro-3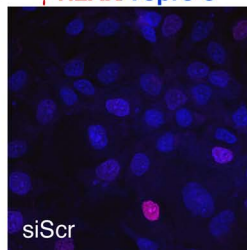 $\gamma$ -H2AX/Topro-3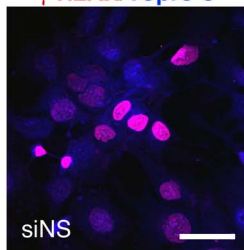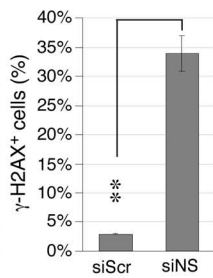

Supplement: NIHMS499758-supplement-Supp_Figure_S1-S5.pdf [file NIHMS499758-supplement-Supp_Figure_S1-S5.pdf]
